# Supplementary material
Source: publisher figshare collection journal article supplement (https://geolsoc.figshare.com/ndownloader/files/14229404)

# Kernel density diagrams for Peninsular Ranges batholith

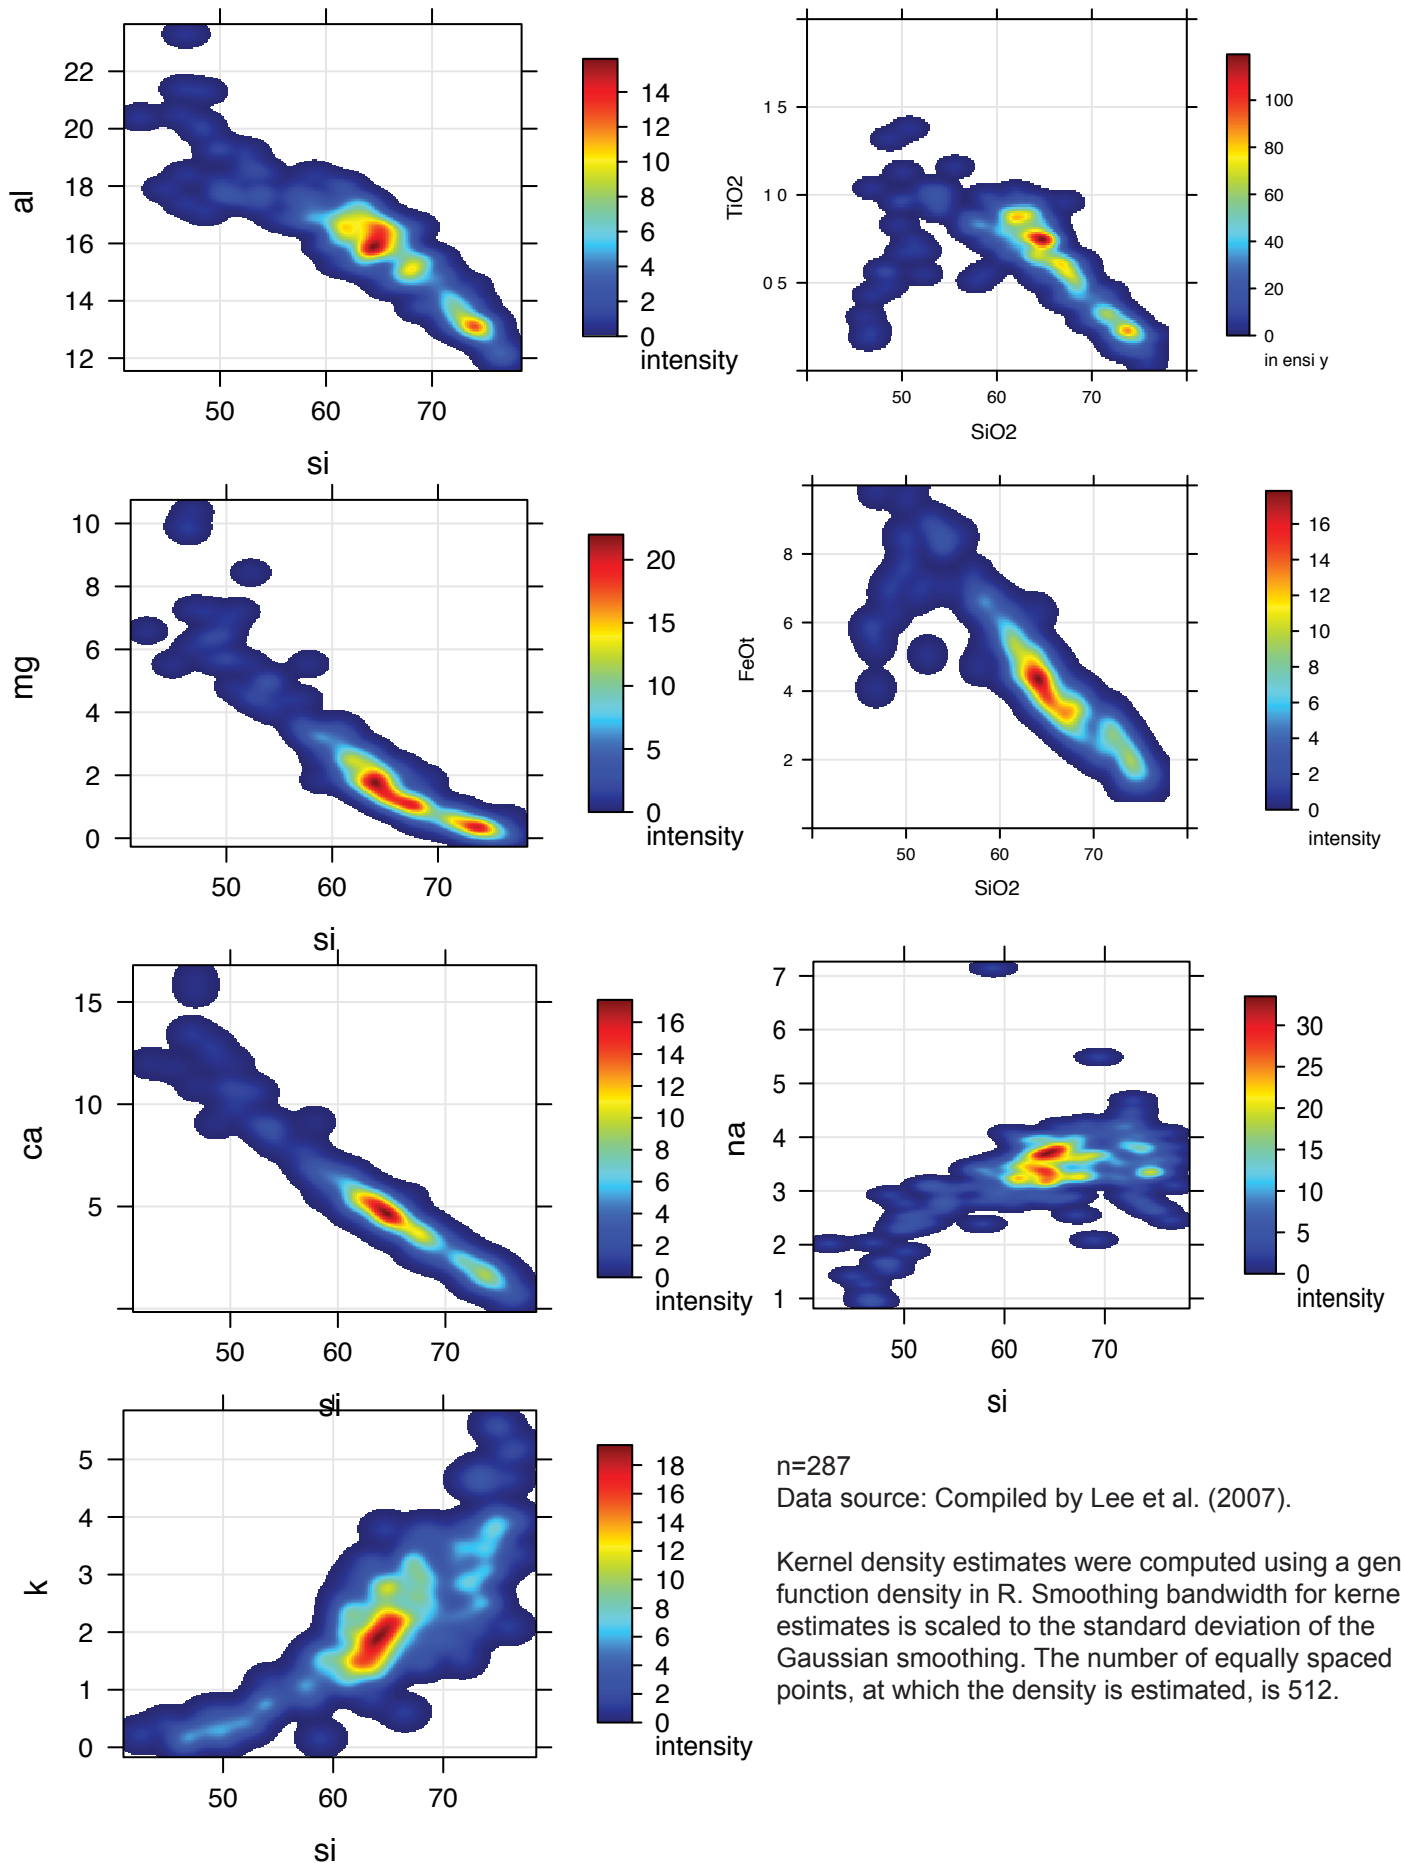

Supplement: Supplementary file 1 [file 14229404]
